# Supplementary material
Source: publisher site journal article supplement (https://www.dovepress.com/get_supplementary_file.php?f=506794.docx)
Supplement: Supplementary file 1 [file get_supplementary_file.php]

**Supplemental Table 1. Primer sequences for capsular, virulence, and carbapenemase genes of *Klebsiella pneumoniae* strains**

| Primers | Primer sequences (5´-3´) | Product length（bp） | Annealing temperature（℃） |
| --- | --- | --- | --- |
| **Capsular genes** | | | |
| K1 | F:GGTGCTCTTTACATCATTGC | 1283 | 54 |
| R: GCAATGGCCATTTGCGTTAG |  |
| K2 | F:GACCCGATATTCATACTTGACAGAG | 641 | 54 |
| R:CCTGAAGTAAAATCGTAAATAGATGGC |  |
| K5 | F:TGGTAGTGATGCTCGCGA | 280 | 55 |
| R:CCTGAACCCACCCCAATC |  |
| K20 | F:CGGTGCTACAGTGCATCATT | 741 | 53 |
| R:GTTATACGATGCTCAGTCGC |  |
| K54 | F: CATTAGCTCAGTGGTTGGCT | 881 | 54 |
| R: GCTTGACAAACACCATAGCAG |  |
| K57 | F:CTCAGGGCTAGAAGTGTCAT | 1037 | 53 |
| R:CACTAACCCAGAAAGTCGAG |  |
| **Virulence genes** | |  |  |
| rmpA | F:ACTGGGCTACCTCTGCTTCA | 516 | 56 |
| R:CTTGCATGAGCCATCTTTCA |  |
| rmpA2 | F:TGTGCAATAAGGATGTTACATTAGT | 609 | 52 |
| R:TTTGATGTGCACCATTTTCA |  |
| Aerobactin | F: GCATAGGCGGATACGAACAT | 556 | 54 |
| R:CACAGGGCAATTGCTTACCT |  |
| peg344 | F:CTTGAAACTATCCCTCCAGTC | 508 | 53 |
| R:CCAGCGAAAGAATAACCCC |  |
| **Carbapenemase genes** | | | |
| KPC-2 | F:CGTCTAGTTCTGTCTTG | 798 | 53 |
| CTTGTAATCCTTGTTAGGCG |  |
| OXA-48 | F:ACACCAAGTCTTTAAGTGGGATG | 186 | 54 |
| R:CCCGAAATGTAATCATTACC |  |
| IMP | F:GGAATAGAGTGGCTTAAYTCTC | 232 | 50 |
| R:GGTTTAAYAAAACAACCACC |  |
| VIM | F:GATGGTGTTTGGTCGCATA | 390 | 56 |
| R:CGAATGCGCAGCACCAG |  |
| NDM | F:GGTTTGGCGATCTGGTTTTC | 621 | 55 |
|  | R:CGGAATGGCTCATCACGATC |  |

**Supplemental Table 2. Primer sequences of *Klebsiella pneumoniae* housekeeping genes**

| Housekeeping genes | Primer sequence (5´-3´) | Product length (bp) | Annealing temperature (℃) |
| --- | --- | --- | --- |
| *rpoB* | F: GGCGAAATGGCWGAGAACCA | 501 | 50 |
| R：GAGTCTTCGAAGTTGTAACC |
| *gapA* | F:TGAAATATGACTCCACTCACGG | 450 | 60 |
| R: CTTCAGAAGCGGCTTTGATGGCTT |  |
| *mdh* | F: CCCAACTCGCTTCAGGTTCAG | 477 | 50 |
| R: CCGTTTTTCCCCAGCAGCAG |  |
| *pgi* | F:GAGAAAAACCTGCCTGTACTGCTGGC | 432 | 50 |
| R: CGCGCCACGCTTTATAGCGGTTAAT |  |
| *phoE* | F: ACCTACCGCAACACCGACTTCTTCGG | 420 | 50 |
| R: TGATCAGAACTGGTAGGTGAT |  |
| *infB* | F: CTCGCTGCTGGACTATATTCG | 318 | 50 |
| R: CGCTTTCAGCTCAAGAACTTC |  |
| *tonB* | F: CTTTATACCTCGGTACATCAGGTT | 414 | 45 |
| R: ATTCGCCGGCTGRGCRGAGAG |  |
